# Supplementary material for: Development of an Antigen Capture Lateral Flow Immunoassay for the Detection of Burkholderia pseudomallei
Source: MDPI journal article supplement (doi:10.3390/diagnostics14101033), 2024-05-16
Supplement: s1 [file s1]

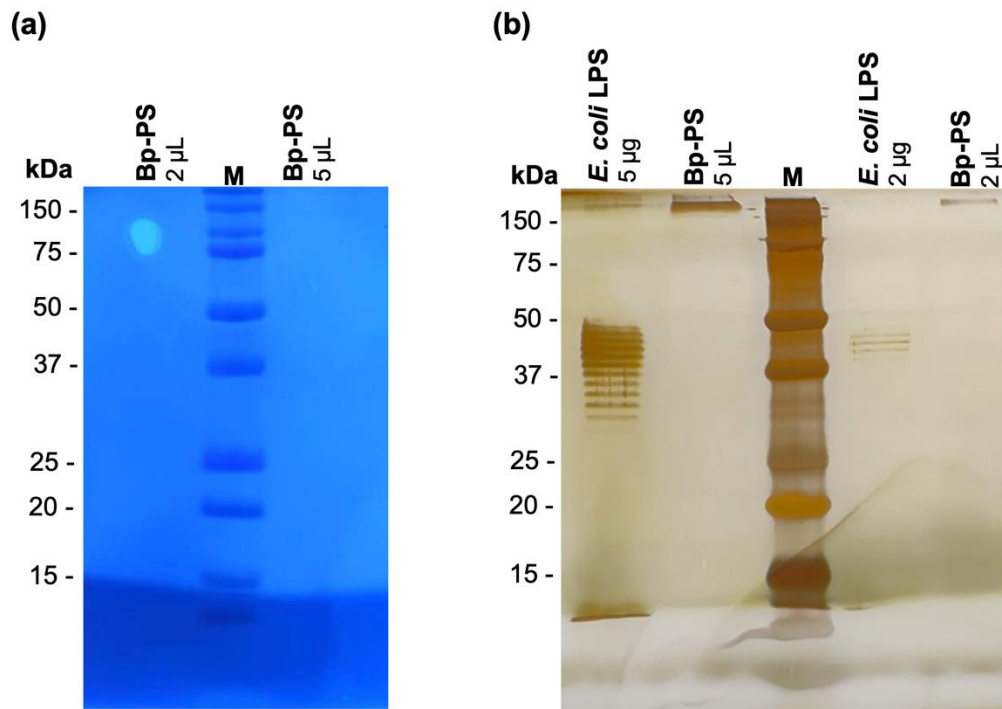

**Figure S1. Bp-PS analyzed by SDS-PAGE with Coomassie blue staining (a) and modified silver staining (b).** Bp-PS samples were loaded on 15% SDS-PAGE gels at 2 µL and 5 µL per lane. *E. coli* LPS samples were also loaded at 2 µg and 5 µg per lane as controls for the modified silver staining. The SDS-PAGE gel with Coomassie blue staining (a) shows no protein band in Bp-PS samples, indicating that proteins were completely removed. Bp-PS in the SDS-PAGE gel with modified silver staining (b) shows a band (possibly polysaccharide) at the high molecular weight, which corresponds to the size of the CPS. The result suggests that Bp-PS contains mainly CPS.

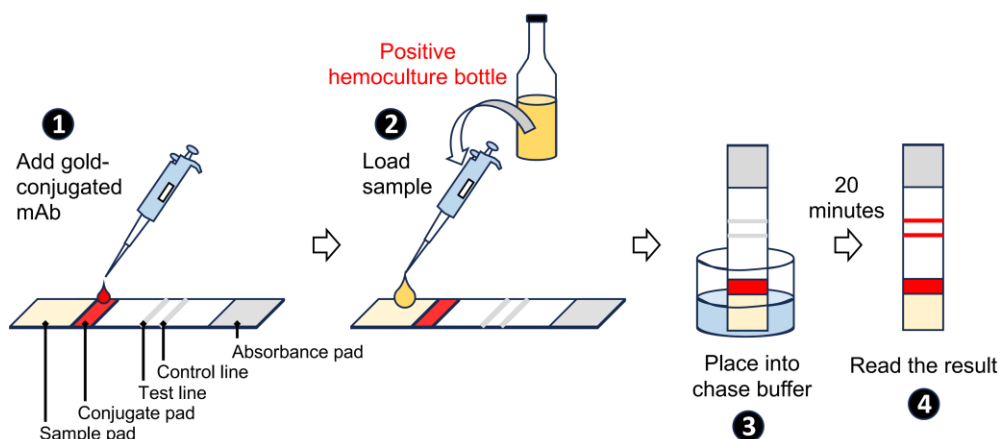

**Figure S2. Step-by-step use of the prototype LFIA.** The use of the prototype LFIA to detect *B. pseudomallei* consists of four steps: (i) add 4 µL of the gold-conjugated Bp2.1 to the conjugate pad; (ii) load 20 µL of hemoculture medium directly onto the sample pad; (iii) place the LFIA into 200 µL of chase buffer and allow it to flow for 20 minutes; and (iv) inspect the test and control lines visually.
